# Supplementary material for: Regulation of Gene Expression of phiEco32-like Bacteriophage 7-11
Source: Preprints.org preprint supplement (doi:10.20944/preprints202201.0045.v1), 2022-01-05
Supplement: Supplementary file 1 [file supplementary]

**Supplementary data**

**Regulation of Gene Expression of phiEco32-like Bacteriophage 7-11**

Daria Lavysh1*, Vladimir Mekler2, Evgeny Klimuk1, and Konstantin Severinov1,2,3*

1Institute of Molecular Genetics of National Research Centre «Kurchatov Institute», Moscow, Russia

2Waksman Institute for Microbiology and Department of Molecular Biology and Biochemistry, Rutgers, State University of New Jersey, Piscataway, USA

3Skolkovo Institute of Science and Technology, Center for Life Sciences, Skolkovo, Russia

**Supplementary Table 1. Primers used for transcription and primer extension experiments.**

Number “x” in a primer name “Px” indicates primers used to obtain a PCR fragment, containing SaPh711_gp47-promoter x. Primers named “Px_pe” were also used for primer extension reactions. Primers labeled as “s70_” correspond to 70 promoters.

| **Primer** | **sequence** |
| --- | --- |
| P1 | GAT ATC CCA TCT ATC AGT GT |
| P1_pe | CCT GCT GTA TTA CCC TTG |
| P8 | GCG TAA TTC CTT CAA TTT CC |
| P8_pe | AAG GTC GTA AGA AAC TAA AGT AG |
| P16 | CAT CCG ACT ACT CCT TAA G |
| P16_pe | ACA TAG GTA TTG AGA CCC AC |
| P22 | ACC TAG TGA CCA AGA CCA GC |
| P22_pe | GAA CGG AGT TGA TTC ATG CG |
| P28 | AGG GTG TCA GAG ACC TCA GC |
| P28_pe | AGT TGC GTT CCC AGA AGT CTT TA |
| P48 | CAT TTG CCG GTG ATT TC |
| P48_pe | CGC GCA TCA TAT ACA TCG |
| P69 | TAA TGT ATC GTC GAG TCA CAC GC |
| P69_pe | CGT CAC GCA TTT TAA AAC ACC |
| s70_P151_1 | TAC AAA CCC TTG TAC TAG TG |
| s70_P151_1_pe | TAA GAA ACA ACG TTT CGA AC |
| s70_P151_2,3 | ATA TTC AAT TCA TCG GGA GG |
| s70_P151_2,3_pe | ACC TAT TTA CTA ACA TCG CC |
| s70_P42 | GGC TAA AGT TGT CGA TGT TG |
| s70_P42_pe | GCG GCC AGA AGA ACA T |
| s70_P99 | CCT TGA AAG GTC CGT AGT C |
| s70_P99_pe | GGT AGC ACG ACC GAT TAC |
| S.N._PompX_pe | AAC AGA ACG TTT CCA TAT CG |
| gp47_pe | GTT TTC TTA GGA GTT GGA GCA C |

**Supplementary Table 2. List of all homologues genes among phiEco32-like phages.** The result of searchers of core genes of the phiEco32 subgroup phages and core genes of the 7-11 subgroup of phages are presented.

| 7-11  NC_015938 | GAP52  NC_019402 | phiEco32  NC_010324 | NJ01  NC_018835 | KBNP1711  KF981730 | ECBP2  NC_018859 | | SU10  KM044272 | | 172-1  KP308307 | | |
| --- | --- | --- | --- | --- | --- | --- | --- | --- | --- | --- | --- |
| SaPh711_gp001 | D858_gp001 | phi32_6 | NJ01_016 | ECBP3_0004 | | ECBP2_0004 | | SU10_04 | | 1721_23 |
| SaPh711_gp004 | D858_gp112 | phi32_7 | NJ01_017 | ECBP3_0005 | | ECBP2_0005 | | SU10_05 | | 1721_24 |
| SaPh711_gp005 | D858_gp111 | phi32_8 | NJ01_018 | ECBP3_0006 | | ECBP2_0006 | | SU10_06 | | 1721_25 |
| SaPh711_gp007 | D858_gp108 | phi32_10 | NJ01_020 | ECBP3_0008 | | ECBP2_0008 | | SU10_08 | | 1721_27 |
| SaPh711_gp012 | D858_gp102 | phi32_13 | NJ01_023 | ECBP3_0011 | | ECBP2_0011 | | SU10_11 | | 1721_30 |
| SaPh711_gp021 | D858_gp093 | phi32_14 | NJ01_024 | ECBP3_0012 | | ECBP2_0012 | | SU10_12 | | 1721_31 |
| SaPh711_gp017 | D858_gp097 | phi32_18 | NJ01_028 | ECBP3_0016 | | ECBP2_0016 | | SU10_16 | | 1721_35 |
| SaPh711_gp018 | D858_gp096 | phi32_19 | NJ01_029 | ECBP3_0017 | | ECBP2_0017 | | SU10_17 | | 1721_36 |
| SaPh711_gp020 | D858_gp094 | phi32_24 | NJ01_034 | ECBP3_0022 | | ECBP2_0022 | | SU10_22 | | 1721_41 |
| SaPh711_gp024 | D858_gp090 | phi32_26 | NJ01_038 | ECBP3_0024 | | ECBP2_0024 | | SU10_24 | | 1721_43 |
| SaPh711_gp045 | D858_gp075 | phi32_33 | NJ01_043 | ECBP3_0029 | | ECBP2_0028 | | SU10_29 | | 1721_49 |
| SaPh711_gp047 | D858_gp073 | phi32_36 | NJ01_046 | ECBP3_0032 | | ECBP2_0031 | | SU10_32 | | 1721_52 |
| SaPh711_gp048 | D858_gp072 | phi32_40 | NJ01_049 | ECBP3_0036 | | ECBP2_0035 | | SU10_37 | | 1721_55 |
| SaPh711_gp068 | D858_gp061 | phi32_58 | NJ01_067 | ECBP3_0056 | | ECBP2_0054 | | SU10_56 | | 1721_72 |
| SaPh711_gp079 | D858_gp050 | phi32_65 | NJ01_077 | ECBP3_0065 | | ECBP2_0061 | | SU10_64 | | 1721_82 |
| SaPh711_gp073 | D858_gp052 | phi32_67 | NJ01_081 | ECBP3_0069 | | ECBP2_0065 | | SU10_66 | | 1721_86 |
| SaPh711_gp086 | D858_gp044 | phi32_77 | NJ01_092 | ECBP3_0080 | | ECBP2_0075 | | SU10_78 | | 1721_97 |
| SaPh711_gp099 | D858_gp036 | phi32_80 | NJ01_096 | ECBP3_0083 | | ECBP2_0079 | | SU10_82 | | 1721_100 |
| SaPh711_gp101 | D858_gp034 | phi32_82 | NJ01_098 | ECBP3_0085 | | ECBP2_0081 | | SU10_84 | | 1721_102 |
| SaPh711_gp102 | D858_gp033 | phi32_83 | NJ01_099 | ECBP3_0086 | | ECBP2_0082 | | SU10_85 | | 1721_103 |
| SaPh711_gp103 | D858_gp032 | phi32_84 | NJ01_100 | ECBP3_0087 | | ECBP2_0083 | | SU10_86 | | 1721_104 |
| SaPh711_gp104 | D858_gp031 | phi32_85 | NJ01_101 | ECBP3_0088 | | ECBP2_0084 | | SU10_087 | | 1721_105 |
| SaPh711_gp105 | D858_gp030 | phi32_86 | NJ01_102 | ECBP3_0089 | | ECBP2_0085 | | SU10_088 | | 1721_106 |
|  |  | phi32_4 | NJ01_004 | ECBP3_0002 | | ECBP2_0002 | | SU10_02 | | 1721_21 |
|  |  | phi32_5 | NJ01_015 | ECBP3_0003 | | ECBP2_0003 | | SU10_03 | | 1721_22 |
|  |  | phi32_9 | NJ01_019 | ECBP3_0007 | | ECBP2_0007 | | SU10_07 | | 1721_26 |
|  |  | phi32_12 | NJ01_022 | ECBP3_0010 | | ECBP2_0010 | | SU10_10 | | 1721_29 |
|  |  | phi32_15 | NJ01_025 | ECBP3_0013 | | ECBP2_0013 | | SU10_13 | | 1721_32 |
|  |  | phi32_16 | NJ01_026 | ECBP3_0014 | | ECBP2_0014 | | SU10_14 | | 1721_33 |
|  |  | phi32_21 | NJ01_031 | ECBP3_0019 | | ECBP2_0019 | | SU10_19 | | 1721_38 |
|  |  | phi32_23 | NJ01_033 | ECBP3_0021 | | ECBP2_0021 | | SU10_21 | | 1721_40 |
|  |  | phi32_30 | NJ01_041 | ECBP3_0027 | | ECBP2_0026 | | SU10_27 | | 1721_47 |
|  |  | phi32_32 | NJ01_042 | ECBP3_0028 | | ECBP2_0027 | | SU10_28 | | 1721_48 |
|  |  | phi32_38 | NJ01_047 | ECBP3_0034 | | ECBP2_0033 | | SU10_34 | | 1721_53 |
|  |  | phi32_42 | NJ01_050 | ECBP3_0037 | | ECBP2_0036 | | SU10_39 | | 1721_56 |
|  |  | phi32_44 | NJ01_054 | ECBP3_0040 | | ECBP2_0039 | | SU10_42 | | 1721_60 |
|  |  | phi32_47 | NJ01_057 | ECBP3_0044 | | ECBP2_0043 | | SU10_45 | | 1721_62 |
|  |  | phi32_48 | NJ01_058 | ECBP3_0045 | | ECBP2_0044 | | SU10_46 | | 1721_63 |
|  |  | phi32_49 | NJ01_059 | ECBP3_0046 | | ECBP2_0045 | | SU10_47 | | 1721_64 |
|  |  | phi32_54 | NJ01_063 | ECBP3_0053 | | ECBP2_0051 | | SU10_52 | | 1721_68 |
|  |  | phi32_56 | NJ01_065 | ECBP3_0054 | | ECBP2_0052 | | SU10_53 | | 1721_70 |
|  |  | phi32_57 | NJ01_066 | ECBP3_0055 | | ECBP2_0053 | | SU10_54 | | 1721_71 |
|  |  | phi32_66 | NJ01_079 | ECBP3_0067 | | ECBP2_0063 | | SU10_65 | | 1721_84 |
|  |  | phi32_69 | NJ01_083 | ECBP3_0071 | | ECBP2_0067 | | SU10_68 | | 1721_88 |
|  |  | phi32_70 | NJ01_084 | ECBP3_0072 | | ECBP2_0068 | | SU10_69 | | 1721_89 |
|  |  | phi32_73 | NJ01_088 | ECBP3_0076 | | ECBP2_0071 | | SU10_73 | | 1721_93 |
|  |  | phi32_76 | NJ01_091 | ECBP3_0079 | | ECBP2_0074 | | SU10_77 | | 1721_96 |
|  |  | phi32_78 | NJ01_094 | ECBP3_0081 | | ECBP2_0077 | | SU10_80 | | 1721_98 |
|  |  | phi32_79 | NJ01_095 | ECBP3_0082 | | ECBP2_0078 | | SU10_81 | | 1721_99 |
|  |  | phi32_81 | NJ01_097 | ECBP3_0084 | | ECBP2_0080 | | SU10_83 | | 1721_101 |
|  |  | phi32_87 | NJ01_103 | ECBP3_0090 | | ECBP2_0086 | | SU10_089 | | 1721_107 |
|  |  | phi32_88 | NJ01_104 | ECBP3_0091 | | ECBP2_0087 | | SU10_090 | | 1721_108 |
|  |  | phi32_89 | NJ01_105 | ECBP3_0092 | | ECBP2_0088 | | SU10_091 | | 1721_109 |
|  |  | phi32_90 | NJ01_106 | ECBP3_0093 | | ECBP2_0089 | | SU10_092 | | 1721_110 |
|  |  | phi32_93 | NJ01_108 | ECBP3_0096 | | ECBP2_0091 | | SU10_094 | | 1721_112 |
|  |  | phi32_94 | NJ01_109 | ECBP3_0097 | | ECBP2_0093 | | SU10_095 | | 1721_113 |
|  |  | phi32_95 | NJ01_110 | ECBP3_0095 | | ECBP2_0095 | | SU10_096 | | 1721_114 |
|  |  | phi32_101 | NJ01_115 | ECBP3_0101 | | ECBP2_0101 | | SU10_100 | | 1721_120 |
|  |  | phi32_107 | NJ01_123 | ECBP3_0107 | | ECBP2_0104 | | SU10_105 | | 1721_127 |
|  |  | phi32_108 | NJ01_124 | ECBP3_0108 | | ECBP2_0105 | | SU10_106 | | 1721_128 |
|  |  | phi32_112 | NJ01_130 | ECBP3_0112 | | ECBP2_0108 | | SU10_110 | | 1721_2 |
|  |  | phi32_114 | NJ01_133 | ECBP3_0114 | | ECBP2_0109 | | SU10_112 | | 1721_5 |
|  |  | phi32_115 | NJ01_134 | ECBP3_0115 | | ECBP2_0110 | | SU10_113 | | 1721_6 |
|  |  | phi32_116 | NJ01_136 | ECBP3_0116 | | ECBP2_0113 | | SU10_115 | | 1721_8 |
|  |  | phi32_120 | NJ01_001 | ECBP3_0119 | | ECBP2_0115 | | SU10_117 | | 1721_12 |
|  |  | phi32_123 | NJ01_004 | ECBP3_0121 | | ECBP2_0117 | | SU10_119 | | 1721_15 |
|  |  | phi32_124 | NJ01_005 | ECBP3_0122 | | ECBP2_0118 | | SU10_120 | | 1721_16 |
|  |  | phi32_127 | NJ01_009 | ECBP3_0125 | | ECBP2_0119 | | SU10_124 | | 1721_19 |
|  |  | phi32_128 | NJ01_010 | ECBP3_0126 | | ECBP2_0120 | | SU10_125 | | 1721_20 |
| SaPh711_gp008 | D858_gp107 | phi32_11 |  |  | |  | |  | |  |
| SaPh711_gp023 | D858_gp091 | phi32_25 |  |  | |  | |  | |  |
| SaPh711_gp097 | D858_gp039 | phi32_29 |  |  | |  | |  | |  |
| SaPh711_gp053 | D858_gp067 | phi32_43 |  |  | |  | |  | |  |
| SaPh711_gp063 | D858_gp064 | phi32_53 |  |  | |  | |  | |  |
| SaPh711_gp078 | D858_gp051 | phi32_68 |  |  | |  | |  | |  |
| SaPh711_gp081 | D858_gp049 | phi32_72 |  |  | |  | |  | |  |
| SaPh711_gp082 | D858_gp047 | phi32_74 |  |  | |  | |  | |  |
| SaPh711_gp084 | D858_gp046 | phi32_75 |  |  | |  | |  | |  |
| SaPh711_gp111 | D858_gp023 | phi32_117 |  |  | |  | |  | |  |
| SaPh711_gp037 | - | phi32_35 |  |  | |  | |  | |  |
| SaPh711_gp052 | - | phi32_47 |  |  | |  | |  | |  |
| SaPh711_gp080 | - | phi32_60 |  |  | |  | |  | |  |
| SaPh711_gp076 | - | phi32_61 |  |  | |  | |  | |  |
| SaPh711_gp074 | - | phi32_64 |  |  | |  | |  | |  |
| SaPh711_gp113 | - | phi32_92 |  |  | |  | |  | |  |
| SaPh711_gp116 | - | phi32_99 |  |  | |  | |  | |  |
| SaPh711_gp135 | - | phi32_112 |  |  | |  | |  | |  |
| SaPh711_gp003 | D858_gp113 | - |  |  | |  | |  | |  |
| SaPh711_gp006 | D858_gp109 | - |  |  | |  | |  | |  |
| SaPh711_gp009 | D858_gp106 | - |  |  | |  | |  | |  |
| SaPh711_gp010 | D858_gp104 | - |  |  | |  | |  | |  |
| SaPh711_gp011 | D858_gp103 | - |  |  | |  | |  | |  |
| SaPh711_gp013 | D858_gp101 | - |  |  | |  | |  | |  |
| SaPh711_gp014 | D858_gp100 | - |  |  | |  | |  | |  |
| SaPh711_gp015 | D858_gp099 | - |  |  | |  | |  | |  |
| SaPh711_gp016 | D858_gp098 | - |  |  | |  | |  | |  |
| SaPh711_gp019 | D858_gp095 | - |  |  | |  | |  | |  |
| SaPh711_gp022 | D858_gp092 | - |  |  | |  | |  | |  |
| SaPh711_gp028 | D858_gp086 | - |  |  | |  | |  | |  |
| SaPh711_gp029 | D858_gp087 | - |  |  | |  | |  | |  |
| SaPh711_gp030 | D858_gp088 | - |  |  | |  | |  | |  |
| SaPh711_gp033 | D858_gp082 | - |  |  | |  | |  | |  |
| SaPh711_gp040 | D858_gp081 | - |  |  | |  | |  | |  |
| SaPh711_gp041 | D858_gp058 | - |  |  | |  | |  | |  |
| SaPh711_gp042 | D858_gp078 | - |  |  | |  | |  | |  |
| SaPh711_gp043 | D858_gp077 | - |  |  | |  | |  | |  |
| SaPh711_gp044 | D858_gp076 | - |  |  | |  | |  | |  |
| SaPh711_gp046 | D858_gp074 | - |  |  | |  | |  | |  |
| SaPh711_gp049 | D858_gp070 | - |  |  | |  | |  | |  |
| SaPh711_gp050 | D858_gp069 | - |  |  | |  | |  | |  |
| SaPh711_gp064 | D858_gp063 | - |  |  | |  | |  | |  |
| SaPh711_gp065 | D858_gp062 | - |  |  | |  | |  | |  |
| SaPh711_gp069 | D858_gp059 | - |  |  | |  | |  | |  |
| SaPh711_gp071 | D858_gp055 | - |  |  | |  | |  | |  |
| SaPh711_gp072 | D858_gp053 | - |  |  | |  | |  | |  |
| SaPh711_gp083 | D858_gp083 | - |  |  | |  | |  | |  |
| SaPh711_gp085 | D858_gp045 | - |  |  | |  | |  | |  |
| SaPh711_gp094 | D858_gp043 | - |  |  | |  | |  | |  |
| SaPh711_gp095 | D858_gp041 | - |  |  | |  | |  | |  |
| SaPh711_gp098 | D858_gp037 | - |  |  | |  | |  | |  |
| SaPh711_gp100 | D858_gp035 | - |  |  | |  | |  | |  |
| SaPh711_gp106 | D858_gp029 | - |  |  | |  | |  | |  |
| SaPh711_gp107 | D858_gp028 | - |  |  | |  | |  | |  |
| SaPh711_gp108 | D858_gp026 | - |  |  | |  | |  | |  |
| SaPh711_gp109 | D858_gp024 | - |  |  | |  | |  | |  |
| SaPh711_gp119 | D858_gp016 | - |  |  | |  | |  | |  |
| SaPh711_gp120 | D858_gp015 | - |  |  | |  | |  | |  |
| SaPh711_gp122 | D858_gp014 | - |  |  | |  | |  | |  |
| SaPh711_gp129 | D858_gp013 | - |  |  | |  | |  | |  |
| SaPh711_gp130 | D858_gp012 | - |  |  | |  | |  | |  |
| SaPh711_gp142 | D858_gp011 | - |  |  | |  | |  | |  |
| SaPh711_gp143 | D858_gp010 | - |  |  | |  | |  | |  |
| SaPh711_gp144 | D858_gp009 | - |  |  | |  | |  | |  |

**Supplementary Table 3. Sequences of predicted late and middle promoters in the phiEco32-like subgroup of phages.**

Sequences of predicted promoter consensus elements are indicated on the left; late promoters are indicated by red-colored font, middle promoter promoters are indicated in green. Promoters numbers match the number of a gene in front of which the promoter is located.

|  | **phiEco32** | **NJ01** | **ECBP2** | **KBNP1711** | **SU10** | **172-1** |
| --- | --- | --- | --- | --- | --- | --- |
| TAATGTAgA  TAATGTATA  TAATGTATA  TAATGTATA  TAATGTATA  aAATGTATA | P6  P13  P26  P40  P58  P68 | P16  P23  P38  P49  P67  P82 | P4  P11  P24  P35  P54  P66 | P4  P11  P24  P35  P56  P70 | P4  P11  P24  P37  P56  P68 | P23  P30  P43  P55  P72  P87 |

**Supplementary Table 4. Sequences of predicted late promoters in the 7-11 and GAP52 phge genomes subgroup of phages.** Promoter numbers match the number of a gene, before which the promoter is located. Promoters with lower levels of matching to consensus sequence are highlighted with a grey-colored font.

| **7-11** | **GAP52** |
| --- | --- |
| P1  GTAATG -(16)- gCTA  P8  GTAAGG -(16)- ACTA  P12  GTAATT -(16)- ACTA  P16  GTAATT -(16)- ACTA  P22  GTAAGG -(16)- ACTA  P28  GTAAGG -(16)- ACTA  P48  GTAAGT -(16)- ACTA  P69  GTAAGT -(16)- ACTA  P84  GTAATG -(17)- ACTA | P1  GTAATa -(16)- ACTA  P107 GTAATa -(16)- ACTA  P98  GTAATc -(16)- ACTA  P92 GTAATa -(16)- ACTA  P86  GTAAGa -(16)- ACTA  P71  GTAAGa -(16)- ACTA  P59  GTAAGa -(16)- ACTA  P48  GTAAGG -(16)- ACTA  P46  GTAATG -(16)- ACTA |
